# Supplementary figures and images for: Prediction of Survival and Tumor Microenvironment Infiltration Based on Pyroptosis-Related lncRNAs in Pancreatic Cancer
Source: Hindawi journal article supplement (doi:10.1155/2022/5634887), 2022-12-30

**a**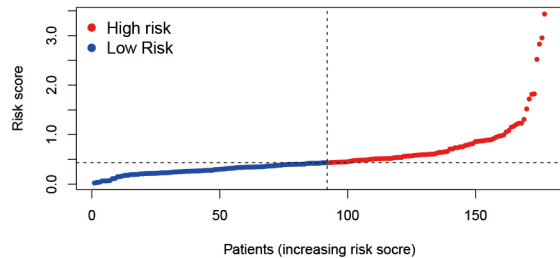**b**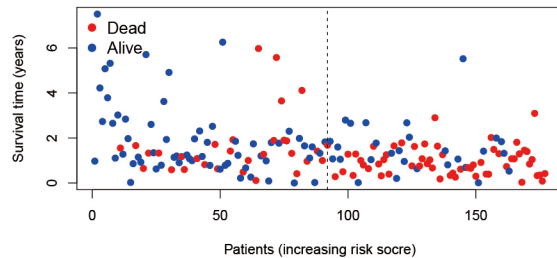**c**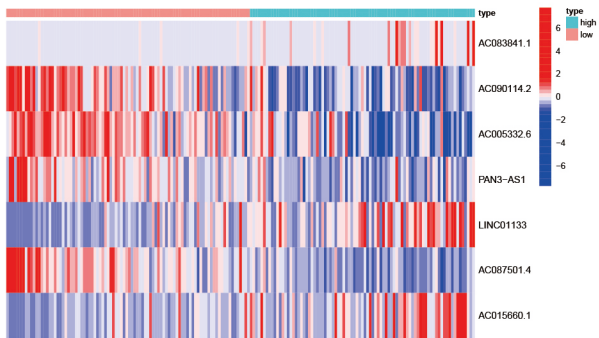**d**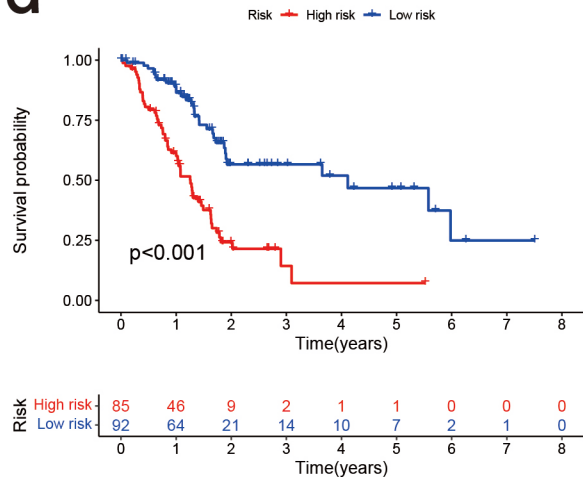**e**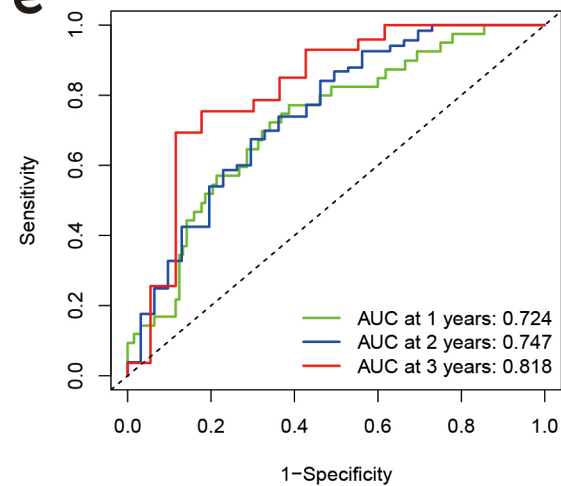

Supplement: f1 [file 5634887.f1.zip]

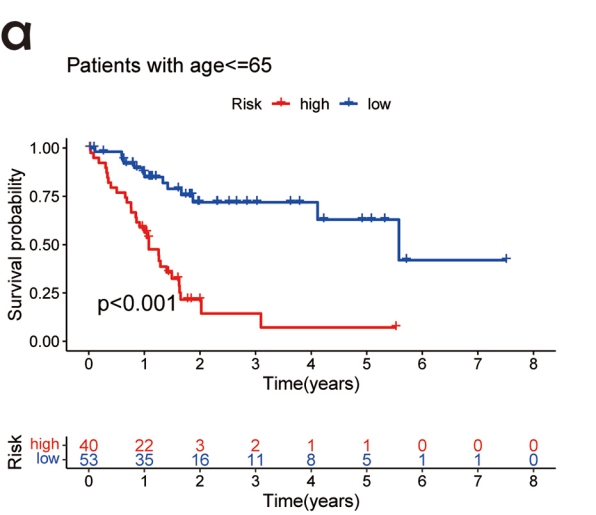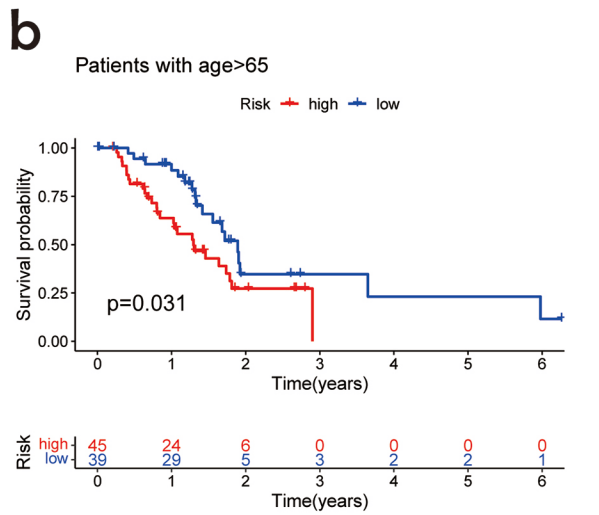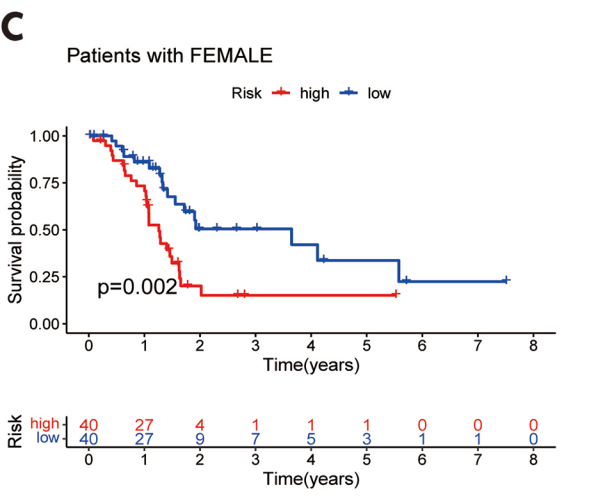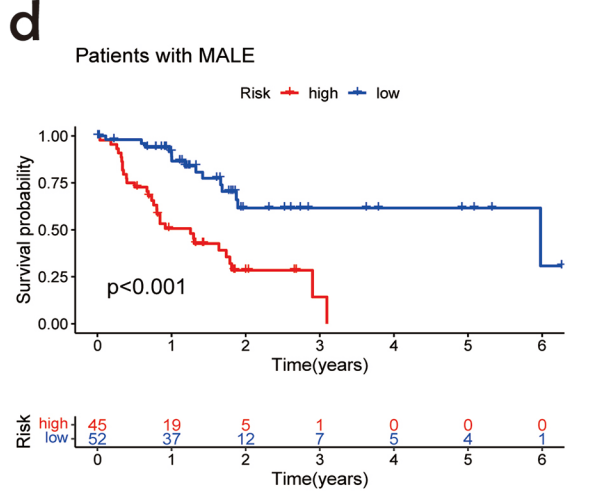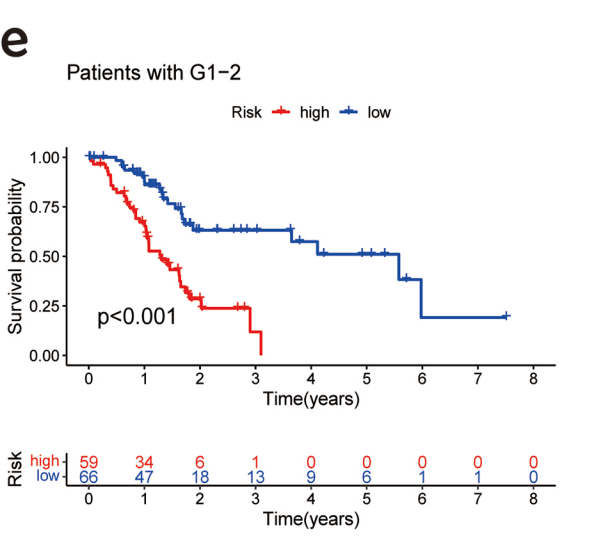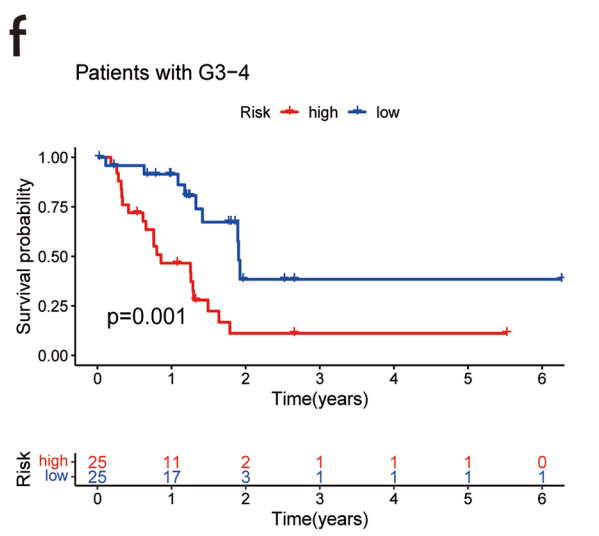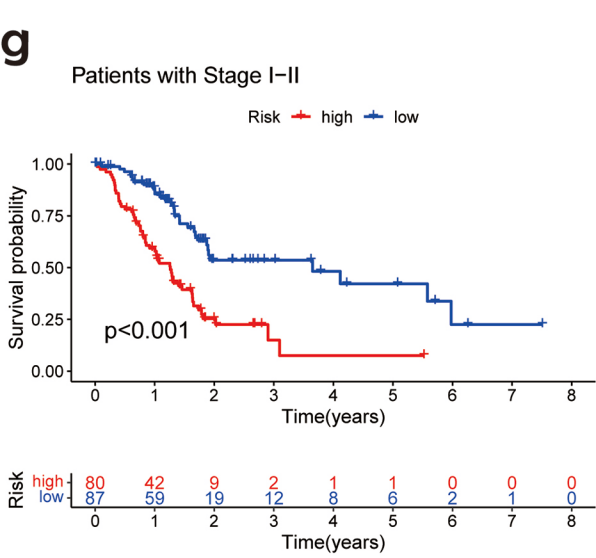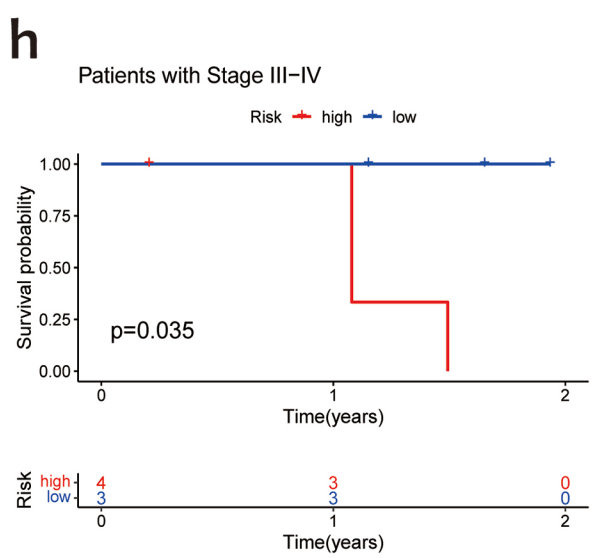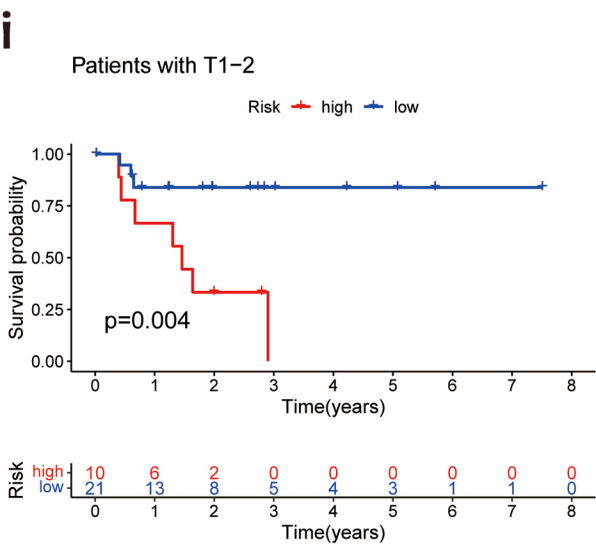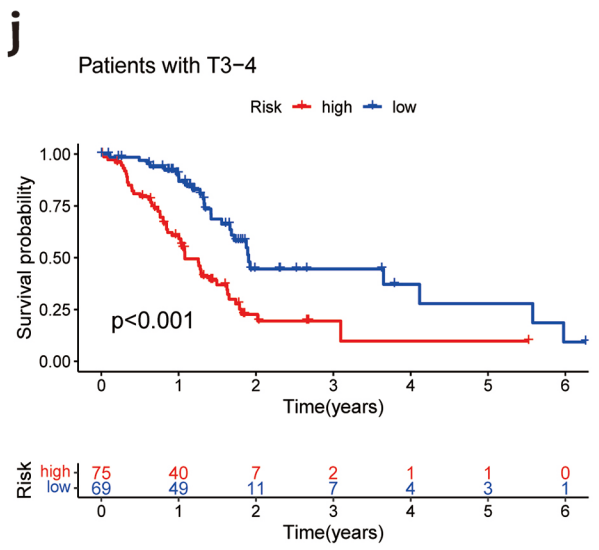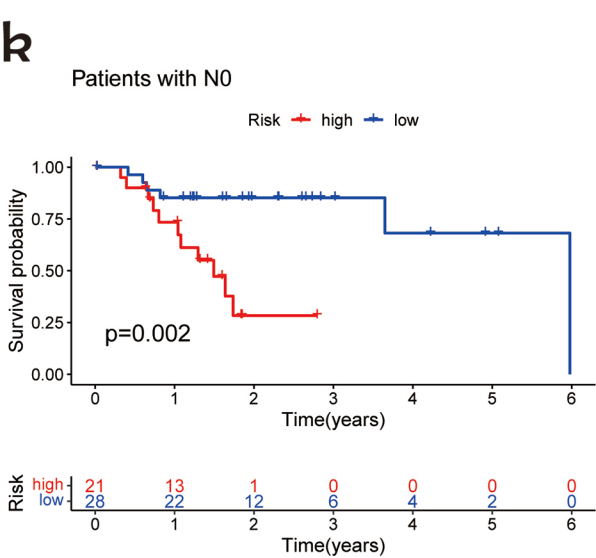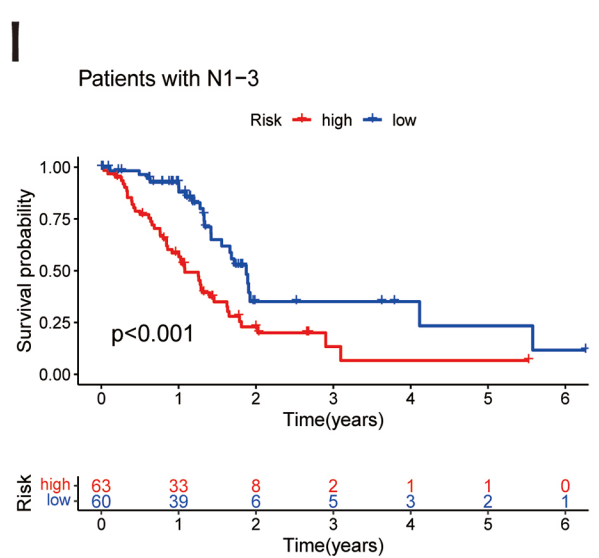

Supplement: f1 [file 5634887.f1.zip]

**a**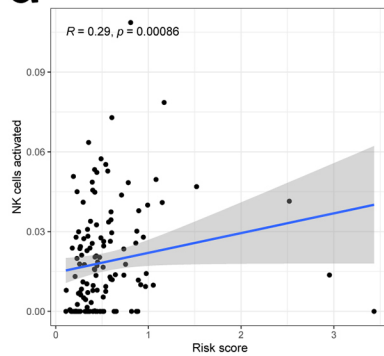**b**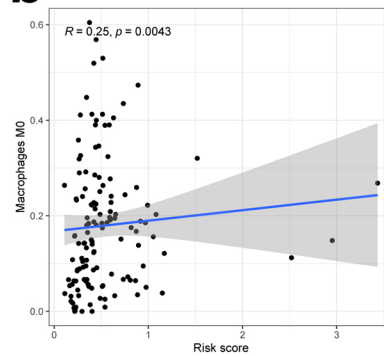**c**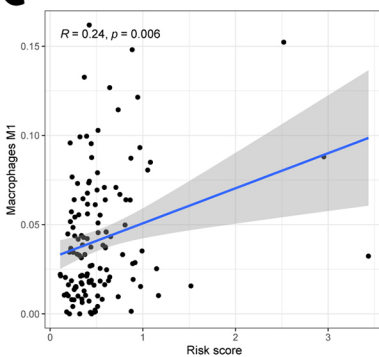**d**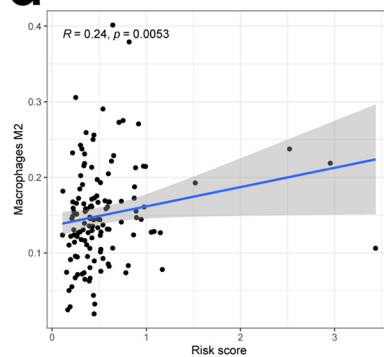**e**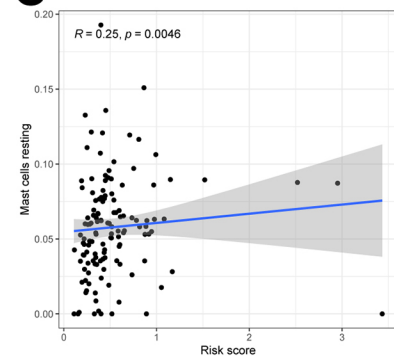**f**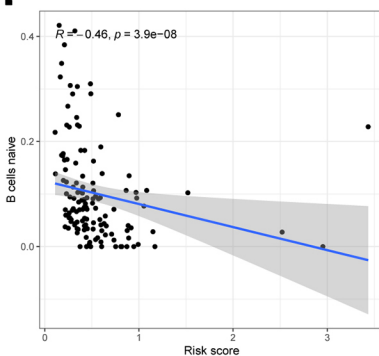**g**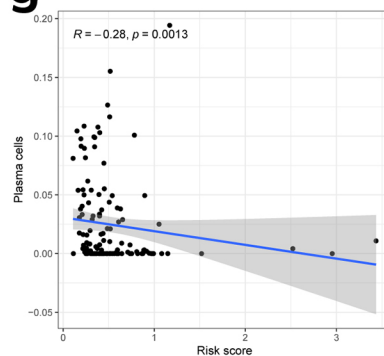**h**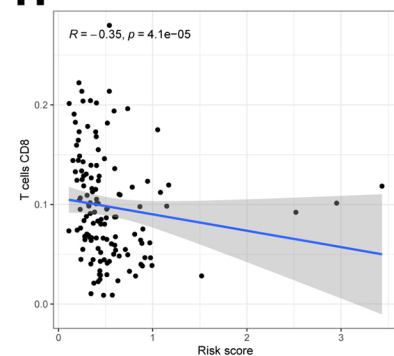**i**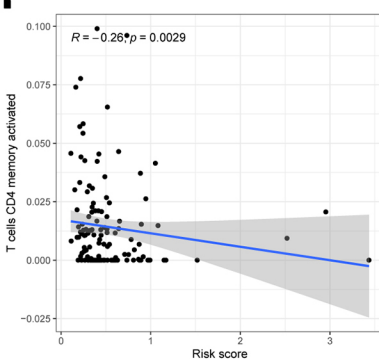**j**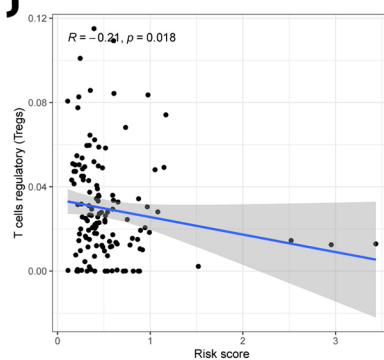**k**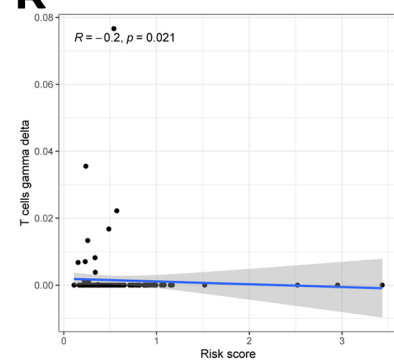

Supplement: f1 [file 5634887.f1.zip]
